# Supplementary material
Source: Research Square preprint supplement (doi:10.21203/rs.3.rs-9327618/v1)
Supplement: Supplementary file 1 [file 86c641e2ceac3b861777a1e8.docx]

Appendix 1. Definitions of patient-reported (P1–P19) and clinician-reported (T1–T7) items.

**Patient**–**perceived items:**

P1 – Fear of falling during daily ambulation with preferred assistive device/orthosis (VAS)

P2 – Perceived risk of falling during daily ambulation with preferred assistive device/orthosis (VAS)

P3 – Perceived overall mobility compared to patient–perceived maximum potential (VAS)

P4 – Degree of use of the most appropriate assistive device/orthosis during upright daily activities (VAS)

P5 – Comfort when using assistive devices/orthoses for walking or standing (VAS)

P6 – Perceived difficulty when using assistive devices/orthoses for walking or standing (VAS)

P7 – Fatigue after using assistive devices/orthoses for 30–40 minutes in a single session (VAS)

P8 – Proportion of upright daily activities performed with walking aids (VAS)

P9 – Proportion of upright daily activities performed with seating aids (e.g., wheelchair) (VAS)

P10 – Average daily hours spent standing (self-reported)

P11 – Average daily hours spent sitting (self-reported)

P12 – Average daily hours spent lying down while awake (self-reported)

P13 – Assistive device/orthosis and physical assistance sufficient for short-distance (WISCI II adapted categorical item) (Patient–perceived WISCI II)

P14 – Assistive device/orthosis and physical assistance planned for indoor ambulation after hospital discharge (WISCI II adapted categorical item)

P15 – Assistive device/orthosis and physical assistance planned for outdoor ambulation after hospital discharge (WISCI II adapted categorical item)

P16 – Number of falls within the past year in therapy settings (self-reported count)

P17 – Number of falls within the past year in non-therapy settings (self-reported count)

P18 – Number of near-fall incidents within the past year in therapy settings (self-reported count)

P19 – Number of near-fall incidents within the past year in non-therapy settings (self-reported count)

**Clinician**–**perceived items:**

T1 – Clinician–perceived patient’s fall risk during daily ambulation with preferred assistive device/orthosis (VAS)

T2 – Overall mobility compared to the patient’s maximum potential (VAS)

T3 – Mobility level compared to a similar person without the injury (VAS)

T4 – Degree of use of the most appropriate assistive device/orthosis during upright daily activities without therapist guidance (VAS)

T5 – Assistive device/orthosis and physical assistance sufficient for short-distance (WISCI II adapted categorical item) (Clinician-perceived WISCI II)

T6 – Assistive device/orthosis and physical assistance recommended for indoor ambulation after hospital discharge (WISCI II adapted categorical item)

T7 – Assistive device/orthosis and physical assistance recommended for outdoor ambulation after hospital discharge (WISCI II adapted categorical item)
