# Supplementary material
Source: Research Square preprint supplement (doi:10.21203/rs.3.rs-9327618/v1)
Supplement: Supplementary file 2 [file 9dff51f5735dc0488fb62d20.docx]

| **Assessments** | **Mean ± SD (median)** |
| --- | --- |
| WISCI II | 9.22 ± 4.31 (9.0) |
| LEMS | 28.24 ± 13.56 (28.0) |
| 10MWT (s) | 73.89 ± 78.33 (49.0) |
| Overground gait speed (m/s) | 0.31 ± 0.25 (0.20) |
| TUG (s) | 67.73 ± 61.69 (42.0) |
| BBS | 17.54 ± 16.74 (9.0) |
| SCIM III | 73.85 ± 13.71 (77.0) |
| SCIM III Mobility | 23.32 ± 6.71 (23.0) |
| WHOQOL BREF | 81.37 ± 17.60 (79.0) |
| WHOQOL BREF Physical Health | 19.37 ± 5.69 (19.0) |
| QUEST 2.0 | 4.19 ± 0.77 (4.3) |
| RHDS/SF | 47.54 ± 18.00 (49.0) |
| AAQ-II | 23.11 ± 12.27 (22.0) |
| SCLCSQ | 39.10 ± 5.58 (41.0) |
| P1 | 4.04 ± 2.66 (3.7) |
| P2 | 4.00 ± 2.58 (3.9) |
| P3 | 3.85 ± 2.95 (3.1) |
| P4 | 5.01 ± 2.05 (4.9) |
| P5 | 4.60 ± 2.85 (4.8) |
| P6 | 4.03 ± 2.34 (4.1) |
| P7 | 5.22 ± 3.04 (5.3) |
| P8 | 4.59 ± 3.79 (4.8) |
| P9 | 5.86 ± 3.46 (5.4) |
| P10 | 3.29 ± 3.09 (2.0) |
| P11 | 5.83 ± 2.64 (6.0) |
| P12 | 6.61 ± 4.10 (6.0) |
| P13 (Patient–perceived WISCI II) | 8.93 ± 4.54 (8.0) |
| P14 | 9.68 ± 5.41 (9.0) |
| P15 | 6.29 ± 6.42 (6.0) |
| P16 | 0.12 ± 0.51 (0.00) |
| P17 | 1.66 ± 5.15 (0.00) |
| P18 | 0.42 ± 1.07 (0.00) |
| P19 | 3.78 ± 9.06 (1.0) |
| T1 | 3.73 ± 2.38 (3.0) |
| T2 | 4.50 ± 2.88 (4.5) |
| T3 | 1.80 ± 2.19 (0.90) |
| T4 | 5.00 ± 1.03 (5.0) |
| T5 (Clinician–perceived WISCI II) | 8.83 ± 3.91 (8.0) |
| T6 | 8.83 ± 4.72 (9.0) |
| T7 | 6.40 ± 5.84 (8.0) |

Table 2. Assessment outcomes

WISCI II: Walking Index for Spinal Cord Injury II (observed/actual); LEMS: Lower Extremity Motor Score; 10MWT: 10-Meter Walk Test; m/s: meters per second; TUG: Timed Up and Go; BBS: Berg Balance Scale; SCIM III: Spinal Cord Independence Measure III; WHOQOL-BREF: World Health Organization Quality of Life-BREF; QUEST 2.0: Quebec User Evaluation of Satisfaction with Assistive Technology 2.0; RHDS/SF: Readiness for Hospital Discharge Scale/Short Form; AAQ-II: Acceptance and Action Questionnaire–II; SCLCSQ: Spinal Cord Lesion–related Coping Strategies Questionnaire; P1–P19: patient-reported items; T1–T7: clinician-reported items (see Appendix 1).
