# Supplementary material
Source: Research Square preprint supplement (doi:10.21203/rs.3.rs-9327618/v1)
Supplement: Supplementary file 3 [file a1476ede9a01f7e22bf5c24d.docx]

Table 3. Correlations among study outcomes

| **Assessments** |  | WISCI II | LEMS | Overground gait speed (m/s) | TUG (s) | BBS | SCIM III | SCIM III Mobility | WHOQOL BREF | WHOQOL BREF Physical Health | QUEST 2.0 | RHDS/SF | AAQ-II | SCLCSQ |
| --- | --- | --- | --- | --- | --- | --- | --- | --- | --- | --- | --- | --- | --- | --- |
| WISCI II | **Coefficient** | 1.000 | 0.570 | 0.770 | -0.693 | 0.770 | 0.735 | 0.664 | -0.147 | 0.105 | 0.184 | 0.245 | 0.247 | -0.106 |
| **p** |  | **< 0.001**** | **< 0.001**** | **< 0.001**** | **< 0.001**** | **< 0.001**** | **< 0.001**** | 0.346 | 0.503 | 0.238 | 0.113 | 0.110 | 0.501 |
| LEMS | **Coefficient** | 0.570 | 1.000 | 0.482 | -0.488 | 0.721 | 0.247 | 0.378 | -0.035 | -0.066 | -0.121 | -0.217 | 0.004 | 0.217 |
| **p** | **< 0.001**** |  | **0.001*** | **0.001*** | **< 0.001**** | 0.111 | **0.012*** | 0.824 | 0.676 | 0.440 | 0.161 | 0.981 | 0.162 |
| Overground gait speed (m/s) | **Coefficient** | 0.770 | 0.482 | 1.000 | -0.964 | 0.701 | 0.722 | 0.614 | -0.147 | 0.019 | 0.254 | 0.196 | 0.258 | 0.086 |
| **p** | **< 0.001**** | **0.001*** |  | **< 0.001**** | **< 0.001**** | **< 0.001**** | **< 0.001**** | 0.346 | 0.904 | 0.100 | 0.208 | 0.094 | 0.583 |
| TUG (s) | **Coefficient** | -0.693 | -0.488 | -0.964 | 1.000 | -0.670 | -0.722 | -0.597 | 0.117 | -0.010 | -0.286 | -0.193 | -0.191 | -0.178 |
| **p** | **< 0.001**** | **0.001*** | **< 0.001**** |  | **< 0.001**** | **< 0.001**** | **< 0.001**** | 0.453 | 0.949 | 0.063 | 0.215 | 0.221 | 0.253 |
| BBS | **Coefficient** | 0.770 | 0.721 | 0.701 | -0.670 | 1.000 | 0.591 | 0.601 | -0.092 | 0.066 | -0.002 | 0.085 | 0.210 | -0.049 |
| **p** | **< 0.001**** | **< 0.001**** | **< 0.001**** | **< 0.001**** |  | **< 0.001**** | **< 0.001**** | 0.559 | 0.672 | 0.989 | 0.587 | 0.177 | 0.754 |
| SCIM III | **Coefficient** | 0.735 | 0.247 | 0.722 | -0.722 | 0.591 | 1.000 | 0.750 | -0.057 | 0.222 | 0.310 | 0.444 | 0.220 | 0.021 |
| **p** | **< 0.001**** | **0.111*** | **< 0.001**** | **< 0.001**** | **< 0.001**** |  | **< 0.001**** | 0.719 | 0.153 | **0.043*** | **0.003*** | 0.155 | 0.895 |
| SCIM III Mobility | **Coefficient** | 0.664 | 0.378 | 0.614 | -0.597 | 0.601 | 0.750 | 1.000 | 0.016 | 0.237 | 0.105 | 0.203 | 0.103 | -0.018 |
| **p** | **< 0.001**** | **0.012*** | **< 0.001**** | **< 0.001**** | **< 0.001**** | **< 0.001**** |  | 0.917 | 0.126 | 0.502 | 0.192 | 0.510 | 0.908 |
| WHOQOL BREF | **Coefficient** | -0.147 | -0.035 | -0.147 | 0.117 | -0.092 | -0.057 | 0.016 | 1.000 | 0.832r | 0.249 | 0.376r | -0.598r | 0.559r |
| **p** | 0.346 | 0.824 | 0.346 | 0.453 | 0.559 | 0.719 | 0.917 |  | **< 0.001**** | 0.107 | **0.013*** | **< 0.001**** | **< 0.001**** |
| WHOQOL BREF Physical Health | **Coefficient** | 0.105 | -0.066 | 0.019 | -0.010 | 0.066 | 0.222 | 0.237 | 0.832r | 1.000 | 0.362 | 0.499r | -0.451r | 0.356r |
| **p** | 0.503 | 0.676 | 0.904 | 0.949 | 0.672 | 0.153 | 0.126 | **< 0.001**** |  | **0.017*** | **0.001*** | **0.002*** | **0.019*** |
| QUEST 2.0 | **Coefficient** | 0.184 | -0.121 | 0.254 | -0.286 | -0.002 | 0.310 | 0.105 | 0.249 | 0.362 | 1.000 | 0.484 | -0.081 | 0.331 |
| **p** | 0.238 | 0.440 | 0.100 | 0.063 | 0.989 | **0.043*** | 0.502 | 0.107 | **0.017*** |  | **0.001*** | 0.605 | **0.030*** |
| RHDS/SF | **Coefficient** | 0.245 | -0.217 | 0.196 | -0.193 | 0.085 | 0.444 | 0.203 | 0.376r | 0.499r | 0.484 | 1.000 | -0.007r | 0.221r |
| **p** | 0.113 | 0.161 | 0.208 | 0.215 | 0.587 | **0.003*** | 0.192 | **0.013*** | **0.001*** | **0.001*** |  | 0.963 | 0.154 |
| AAQ-II | **Coefficient** | 0.247 | 0.004 | 0.258 | -0.191 | 0.210 | 0.220 | 0.103 | -0.598r | -0.451r | -0.081 | -0.007r | 1.000 | -0.282r |
| **p** | 0.110 | 0.981 | 0.094 | 0.221 | 0.177 | 0.155 | 0.510 | **< 0.001**** | **0.002*** | 0.605 | 0.963 |  | 0.067 |
| SCLCSQ | **Coefficient** | -0.106 | 0.217 | 0.086 | -0.178 | -0.049 | 0.021 | -0.018 | 0.559r | 0.356r | 0.331 | 0.221r | -0.282r | 1.000 |
| **p** | 0.501 | 0.162 | 0.583 | 0.253 | 0.754 | 0.895 | 0.908 | **< 0.001**** | **0.019*** | **0.030*** | 0.154 | 0.067 |  |

Table 3. Correlations among study outcomes (continued)

| **Assessments** |  | P1 | P2 | P3 | P4 | P5 | P6 | P7 | P8 | P9 | P10 | P11 | P12 | P13 | P14 | P15 | P16 | P17 | P18 | P19 | T1 | T2 | T3 | T4 | T5 | T6 | T7 |
| --- | --- | --- | --- | --- | --- | --- | --- | --- | --- | --- | --- | --- | --- | --- | --- | --- | --- | --- | --- | --- | --- | --- | --- | --- | --- | --- | --- |
| WISCI II | **Coefficient** | 0.085 | -0.128 | 0.279 | -0.179 | 0.106 | -0.212 | 0.079 | 0.530 | -0.533 | 0.625 | 0.237 | -0.295 | 0.942 | 0.919 | 0.748 | 0.127 | 0.273 | -0.062 | 0.464 | -0.191 | 0.088 | 0.399 | 0.143 | 0.801 | 0.748 | 0.752 |
| **p** | 0.588 | 0.412 | 0.070 | 0.251 | 0.497 | 0.172 | 0.613 | **< 0.001**** | **< 0.001**** | **< 0.001**** | 0.126 | 0.055 | **< 0.001**** | **< 0.001**** | **< 0.001**** | 0.417 | 0.077 | 0.691 | **0.002*** | 0.221 | 0.574 | **0.008*** | 0.360 | **< 0.001**** | **< 0.001**** | **< 0.001**** |
| LEMS | **Coefficient** | -0.061 | 0.100 | 0.089 | 0.027 | 0.213 | -0.206 | 0.102 | 0.428 | -0.439 | 0.175 | 0.039 | -0.014 | 0.567 | 0.527 | 0.400 | 0.251 | 0.320 | 0.075 | 0.522 | -0.014 | -0.236 | .337* | 0.142 | 0.468 | 0.416 | 0.507 |
| **p** | 0.697 | 0.523 | 0.570 | 0.864 | 0.171 | 0.184 | 0.516 | **0.004*** | **0.003*** | 0.262 | 0.806 | 0.928 | **< 0.001**** | **< 0.001**** | **0.008*** | 0.104 | **0.037*** | 0.633 | **< 0.001**** | 0.930 | 0.128 | **0.027*** | 0.364 | **0.002*** | **0.005*** | **0.001*** |
| 10MWT | **Coefficient** | -0.174 | 0.111 | -0.446 | 0.189 | -0.190 | 0.072 | -0.115 | -0.649 | 0.512 | -0.728 | -0.326 | 0.413 | -0.734 | -0.714 | -0.645 | -0.125 | -0.302 | 0.093 | -0.325 | 0.091 | -0.086 | -0.261 | -0.052 | -0.667 | -0.649 | -0.695 |
| **p** | 0.264 | 0.477 | **0.003*** | 0.224 | 0.223 | 0.648 | 0.463 | **< 0.001**** | **< 0.001**** | **< 0.001**** | **0.033*** | **0.006*** | **< 0.001**** | **< 0.001**** | **< 0.001**** | 0.424 | **0.049*** | 0.553 | **0.033*** | 0.562 | 0.583 | 0.090 | 0.741 | **< 0.001**** | **< 0.001**** | **< 0.001**** |
| Overground gait speed (m/s) | **Coefficient** | 0.174 | -0.111 | 0.446 | -0.189 | 0.190 | -0.072 | 0.115 | 0.649 | -0.512 | 0.728 | 0.326 | -0.413 | 0.734 | 0.714 | 0.645 | 0.125 | 0.302 | -0.093 | 0.325 | -0.091 | 0.086 | 0.261 | 0.052 | 0.667 | 0.649 | 0.695 |
| **p** | 0.264 | 0.477 | **0.003*** | 0.224 | 0.223 | 0.648 | 0.463 | **< 0.001**** | **< 0.001**** | **< 0.001**** | **0.033*** | **0.006*** | **< 0.001**** | **< 0.001**** | **< 0.001**** | 0.424 | **0.049*** | 0.553 | **0.033*** | 0.562 | 0.583 | 0.090 | 0.741 | **< 0.001**** | **< 0.001**** | **< 0.001**** |
| TUG (s) | **Coefficient** | -0.193 | 0.116 | -0.492 | 0.190 | -0.205 | 0.065 | -0.106 | -0.675 | 0.528 | -0.711 | -0.284 | 0.417 | -0.680 | -0.634 | -0.620 | -0.111 | -0.376 | 0.127 | -0.378 | 0.051 | 0.027 | -0.170 | -0.027 | -0.628 | -0.608 | -0.676 |
| **p** | 0.215 | 0.460 | **0.001*** | 0.223 | 0.187 | 0.678 | 0.499 | **< 0.001**** | **< 0.001**** | **< 0.001**** | 0.065 | 0.005 | **< 0.001**** | **< 0.001**** | **< 0.001**** | 0.477 | **0.013*** | 0.418 | **0.012*** | 0.746 | 0.865 | 0.276 | 0.864 | **< 0.001**** | **< 0.001**** | **< 0.001**** |
| BBS | **Coefficient** | 0.164 | -0.090 | 0.162 | -0.079 | 0.142 | < 0.001** | 0.148 | 0.511 | -0.548 | 0.441 | 0.061 | -0.244 | 0.721 | 0.742 | 0.570 | 0.172 | 0.303 | -0.053 | 0.310 | -0.096 | -0.019 | 0.300 | 0.106 | 0.751 | 0.673 | 0.706 |
| **p** | 0.292 | 0.565 | 0.299 | 0.613 | 0.363 | 0.999 | 0.344 | **< 0.001**** | **< 0.001**** | **0.003*** | 0.697 | 0.115 | **< 0.001**** | **< 0.001**** | **< 0.001**** | 0.271 | **0.048*** | 0.734 | **0.043*** | 0.541 | 0.901 | 0.051 | 0.499 | **< 0.001**** | **< 0.001**** | **< 0.001**** |
| SCIM III | **Coefficient** | 0.109 | -0.414 | 0.462 | -0.298 | 0.147 | -0.121 | -0.009 | 0.599 | -0.624 | 0.761 | 0.064 | -0.386 | 0.715 | 0.737 | 0.737 | 0.192 | 0.327 | -0.016 | 0.315 | -0.125 | 0.154 | 0.187 | -0.044 | 0.734 | 0.760 | 0.714 |
| **p** | 0.486 | **0.006*** | **0.002*** | 0.052 | 0.348 | 0.440 | 0.953 | **< 0.001**** | **< 0.001**** | **< 0.001**** | 0.685 | **0.011*** | **< 0.001**** | **< 0.001**** | **< 0.001**** | 0.218 | **0.032*** | 0.916 | **0.039*** | 0.425 | 0.323 | 0.231 | 0.781 | **< 0.001**** | **< 0.001**** | **< 0.001**** |
| SCIM III Mobility | **Coefficient** | -0.020 | -0.473 | 0.206 | -0.371 | 0.087 | -0.333 | 0.032 | 0.509 | -0.578 | 0.548 | 0.198 | -0.364 | 0.666 | 0.601 | 0.612 | 0.279 | 0.285 | 0.189 | 0.336 | -0.205 | -0.086 | 0.147 | -0.256 | 0.612 | 0.547 | 0.596 |
| **p** | 0.899 | **0.001*** | 0.186 | **0.014*** | 0.579 | **0.029*** | 0.840 | **< 0.001**** | **< 0.001**** | **< 0.001**** | 0.203 | **0.016*** | **< 0.001**** | **< 0.001**** | **< 0.001**** | 0.070 | 0.064 | 0.224 | **0.028*** | 0.188 | 0.585 | 0.346 | 0.098 | **< 0.001**** | **< 0.001**** | **< 0.001**** |
| WHOQOL BREF | **Coefficient** | -0.293 | -0.243r | 0.035 | -0.019 | 0.033r | -0.201r | -0.143r | 0.005 | 0.022 | -0.160r | -0.060r | 0.033 | -0.109r | 0.001r | -0.053 | -0.104 | -0.043 | -0.146 | -0.127 | 0.097 | 0.035r | 0.141 | -0.012 | -0.215r | -0.145r | -0.157 |
| **p** | 0.056 | 0.116 | 0.821 | 0.902 | 0.835 | 0.197 | 0.361 | 0.977 | 0.890 | 0.305 | 0.701 | 0.834 | 0.487 | 0.995 | 0.733 | 0.508 | 0.782 | 0.349 | 0.418 | 0.534 | 0.824 | 0.367 | 0.939 | 0.166 | 0.352 | 0.314 |
| WHOQOL BREF Physical Health | **Coefficient** | -0.160 | -0.357*r | 0.131 | -0.068 | 0.149r | -0.277r | -0.178r | 0.144 | -0.154 | 0.057r | -0.047r | -0.064 | 0.160r | 0.189r | 0.106 | -0.171 | -0.086 | -0.163 | -0.136 | 0.097 | 0.095r | 0.179 | -0.056 | 0.019r | -0.003r | 0.029 |
| **p** | 0.305 | **0.019*** | 0.403 | 0.666 | 0.339 | 0.072 | 0.253 | 0.358 | 0.323 | 0.718 | 0.767 | 0.685 | 0.306 | 0.226 | 0.500 | 0.273 | 0.585 | 0.295 | 0.385 | 0.535 | 0.543 | 0.251 | 0.722 | 0.905 | 0.987 | 0.853 |
| QUEST 2.0 | **Coefficient** | -0.161 | -0.320 | 0.320 | -0.284 | 0.130 | -0.258 | -0.291 | 0.085 | -0.086 | 0.336 | 0.286 | -0.103 | 0.163 | 0.173 | 0.158 | -0.185 | -0.066 | -0.374 | 0.006 | -0.180 | 0.127 | 0.155 | 0.149 | 0.021 | 0.049 | 0.002 |
| **p** | 0.302 | **0.037*** | **0.036*** | 0.065 | 0.406 | 0.095 | 0.058 | 0.588 | 0.582 | **0.027*** | 0.063 | 0.509 | 0.297 | 0.268 | 0.311 | 0.236 | 0.672 | **0.013*** | 0.970 | 0.249 | 0.418 | 0.321 | 0.340 | 0.893 | 0.753 | 0.991 |
| RHDS/SF | **Coefficient** | -0.232 | -0.405*r* | 0.237 | -0.195 | 0.106r | -0.025r | -0.231r | 0.187 | -0.249 | 0.457r | 0.039r | -0.305 | 0.256r | 0.238r | 0.179 | -0.076 | 0.020 | -0.413 | -0.001 | 0.000 | 0.271r | 0.137 | 0.052 | 0.197r | 0.144r | 0.087 |
| **p** | 0.135 | **0.007*** | 0.126 | 0.210 | 0.497 | 0.875 | 0.136 | 0.231 | 0.108 | **0.002*** | 0.802 | **0.046*** | 0.097 | 0.125 | 0.251 | 0.627 | 0.899 | **0.006*** | 0.993 | 0.998 | 0.079 | 0.379 | 0.741 | 0.206 | 0.356 | 0.581 |
| AAQ-II | **Coefficient** | 0.132 | 0.281r | 0.149 | -0.009 | -0.114r | 0.240r | 0.293r | 0.108 | -0.088 | 0.332r | 0.195r | -0.131 | 0.221r | 0.220r | 0.116 | 0.025 | 0.177 | -0.044 | 0.008 | -0.203 | 0.153r | 0.009 | 0.126 | 0.351r | 0.405r | 0.297 |
| **p** | 0.400 | 0.068 | 0.341 | 0.956 | 0.465 | 0.121 | 0.056 | 0.492 | 0.573 | **0.030*** | 0.211 | 0.401 | 0.155 | 0.155 | 0.461 | 0.875 | 0.257 | 0.779 | 0.959 | 0.191 | 0.327 | 0.953 | 0.420 | **0.021*** | **0.007*** | 0.053 |
| SCLCSQ | **Coefficient** | -0.029 | -0.101r | 0.181 | 0.059 | 0.252r | -0.231r | -0.171r | 0.134 | -0.019 | 0.064r | 0.119r | -0.020 | -0.103r | -0.095r | -0.067 | -0.141 | 0.027 | -0.206 | 0.130 | 0.059 | -0.030r | 0.227 | -0.113 | -0.223r | -0.174r | -0.218 |
| **p** | 0.851 | 0.521 | 0.246 | 0.705 | 0.103 | 0.136 | 0.273 | 0.392 | 0.901 | 0.681 | 0.449 | 0.900 | 0.512 | 0.545 | 0.672 | 0.368 | 0.865 | 0.185 | 0.408 | 0.707 | 0.847 | 0.143 | 0.471 | 0.150 | 0.263 | 0.161 |

Table 3. Correlations among study outcomes (continued)

| **Assessments** |  | P1 | P2 | P3 | P4 | P5 | P6 | P7 | P8 | P9 | P10 | P11 | P12 | P13 | P14 | P15 | P16 | P17 | P18 | P19 |
| --- | --- | --- | --- | --- | --- | --- | --- | --- | --- | --- | --- | --- | --- | --- | --- | --- | --- | --- | --- | --- |
| P1 | **Coefficient** | 1.000 | 0.238 | 0.104 | 0.018 | -0.028 | 0.390 | 0.310 | -0.033 | 0.159 | 0.009 | 0.083 | -0.076 | 0.103 | 0.147 | 0.103 | -0.163 | -0.021 | -0.030 | -0.029 |
| **p** |  | 0.124 | 0.505 | 0.911 | 0.858 | **0.010*** | **0.043*** | 0.834 | 0.308 | 0.953 | 0.596 | 0.626 | 0.512 | 0.346 | 0.513 | 0.297 | 0.893 | 0.850 | 0.855 |
| P2 | **Coefficient** | 0.238 | 1.000 | -0.142 | 0.338 | -0.249r | 0.278r | 0.536 | -0.155 | 0.317 | -0.365 | -0.028r | 0.220 | -0.247r | -0.156r | -0.180 | -0.159 | 0.129 | 0.019 | 0.073 |
| **p** | 0.124 |  | 0.363 | **0.027*** | 0.108 | 0.071 | **< 0.001**** | 0.320 | **0.039*** | **0.016*** | 0.859 | 0.156 | 0.110 | 0.318 | 0.248 | 0.308 | 0.411 | 0.901 | 0.641 |
| P3 | **Coefficient** | 0.104 | -0.142 | 1.000 | 0.040 | 0.251 | -0.067 | -0.115 | 0.437 | -0.266 | 0.495 | -0.083 | 0.035 | 0.323 | 0.316 | .352* | 0.044 | 0.309 | -0.020 | 0.190 |
| **p** | 0.505 | 0.363 |  | 0.797 | 0.104 | 0.667 | 0.464 | **0.003*** | 0.085 | **0.001*** | 0.596 | 0.821 | **0.035*** | **0.039*** | 0.021 | 0.781 | **0.044*** | 0.897 | 0.223 |
| P4 | **Coefficient** | 0.018 | 0.338 | 0.040 | 1.000 | -0.148 | 0.403 | 0.091 | -0.157 | 0.160 | -0.291 | -0.288 | 0.376 | -0.182 | -0.223 | -0.153 | -0.365 | -0.245 | -0.190 | -0.234 |
| **p** | 0.911 | **0.027*** | 0.797 |  | 0.345 | **0.007*** | 0.562 | 0.315 | 0.306 | 0.058 | 0.061 | **0.013*** | 0.242 | 0.151 | 0.327 | **0.016*** | 0.114 | 0.223 | 0.132 |
| P5 | **Coefficient** | -0.028 | -0.249r | 0.251 | -0.148 | 1.000 | -0.155r | -0.413 | 0.510 | -0.356 | 0.301 | 0.142r | -0.137 | 0.148r | 0.024r | 0.085 | -0.063 | 0.050 | -0.067 | -0.061 |
| **p** | 0.858 | 0.108 | 0.104 | 0.345 |  | 0.321 | **0.006*** | **< 0.001**** | **0.019*** | 0.050 | 0.365 | 0.380 | 0.343 | 0.877 | 0.587 | 0.688 | 0.749 | 0.670 | 0.695 |
| P6 | **Coefficient** | 0.390 | 0.278r | -0.067 | 0.403 | -0.155r | 1.000 | 0.317 | -0.033 | 0.043 | -0.127 | -0.170r | 0.181 | -0.215r | -0.154r | -0.132 | -0.320 | -0.159 | -0.170 | -0.417 |
| **p** | **0.010*** | 0.071 | 0.667 | **0.007*** | 0.321 |  | **0.038*** | 0.833 | 0.784 | 0.417 | 0.275 | 0.244 | 0.167 | 0.324 | 0.399 | **0.037*** | 0.309 | 0.275 | **0.005*** |
| P7 | **Coefficient** | 0.310 | 0.536 | -0.115 | 0.091 | -0.413 | 0.317 | 1.000 | -0.023 | 0.028 | -0.082 | 0.111 | 0.126 | 0.025 | 0.163 | 0.153 | 0.016 | 0.309 | 0.093 | 0.125 |
| **p** | **0.043*** | **< 0.001**** | 0.464 | 0.562 | **0.006*** | **0.038*** |  | 0.884 | 0.858 | 0.600 | 0.479 | 0.420 | 0.875 | 0.295 | 0.328 | 0.917 | **0.044*** | 0.555 | 0.424 |
| P8 | **Coefficient** | -0.033 | -0.155 | 0.437 | -0.157 | 0.510 | -0.033 | -0.023 | 1.000 | -0.774 | 0.621 | 0.197 | -0.384 | 0.517 | 0.482 | .508** | -0.014 | 0.313 | -0.042 | 0.212 |
| **p** | 0.834 | 0.320 | **0.003*** | 0.315 | **< 0.001**** | 0.833 | 0.884 |  | **< 0.001**** | **< 0.001**** | 0.206 | **0.011*** | **< 0.001**** | **0.001*** | 0.001 | 0.927 | **0.041*** | 0.791 | 0.173 |
| P9 | **Coefficient** | 0.159 | 0.317 | -0.266 | 0.160 | -0.356 | 0.043 | 0.028 | -0.774 | 1.000 | -0.554 | -0.025 | 0.324 | -0.513 | -0.476 | -.561** | -0.161 | -0.280 | 0.014 | -0.242 |
| **p** | 0.308 | **0.039*** | 0.085 | 0.306 | **0.019*** | 0.784 | 0.858 | **< 0.001**** |  | **< 0.001**** | 0.874 | 0.034 | **< 0.001**** | **0.001*** | 0.000 | 0.303 | 0.069 | 0.930 | 0.118 |
| P10 | **Coefficient** | 0.009 | -0.365 | 0.495 | -0.291 | 0.301 | -0.127 | -0.082 | 0.621 | -0.554 | 1.000 | 0.294 | -0.579 | 0.570 | 0.594 | .638** | 0.122 | 0.266 | -0.045 | 0.316 |
| **p** | 0.953 | **0.016*** | **0.001*** | 0.058 | 0.050 | 0.417 | 0.600 | **< 0.001**** | **< 0.001**** |  | 0.056 | **< 0.001**** | **< 0.001**** | **< 0.001**** | 0.000 | 0.437 | 0.085 | 0.775 | **0.039*** |
| P11 | **Coefficient** | 0.083 | -0.028r | -0.083 | -0.288 | 0.142r | -0.170r | 0.111 | 0.197 | -0.025 | 0.294 | 1.000 | -0.434 | 0.216r | 0.172r | 0.121 | -0.245 | 0.057 | -0.260 | 0.052 |
| **p** | 0.596 | 0.859 | 0.596 | 0.061 | 0.365 | 0.275 | 0.479 | 0.206 | 0.874 | 0.056 |  | **0.004*** | 0.164 | 0.270 | 0.441 | 0.114 | 0.719 | 0.093 | 0.741 |
| P12 | **Coefficient** | -0.076 | 0.220 | 0.035 | 0.376 | -0.137 | 0.181 | 0.126 | -0.384 | 0.324 | -0.579 | -0.434 | 1.000 | -0.279 | -0.198 | -0.224 | 0.113 | -0.077 | 0.160 | -0.111 |
| **p** | 0.626 | 0.156 | 0.821 | **0.013*** | 0.380 | 0.244 | 0.420 | **0.011*** | **0.034*** | **< 0.001**** | **0.004*** |  | 0.070 | 0.204 | 0.148 | 0.471 | 0.622 | 0.306 | 0.480 |
| P13 | **Coefficient** | 0.103 | -0.247r | 0.323 | -0.182 | 0.148r | -0.215r | 0.025 | 0.517 | -0.513 | 0.570 | 0.216r | -0.279 | 1.000 | 0.847r | .683** | 0.130 | 0.295 | -0.031 | 0.420 |
| **p** | 0.512 | 0.110 | **0.035*** | 0.242 | 0.343 | 0.167 | 0.875 | **< 0.001**** | **< 0.001**** | **< 0.001**** | 0.164 | 0.070 |  | **< 0.001**** | 0.000 | 0.405 | 0.055 | 0.842 | **0.005*** |
| P14 | **Coefficient** | 0.147 | -0.156r | 0.316 | -0.223 | 0.024r | -0.154r | 0.163 | 0.482 | -0.476 | 0.594 | 0.172r | -0.198 | 0.847r | 1.000 | .833** | 0.166 | 0.338 | 0.056 | 0.390 |
| **p** | 0.346 | 0.318 | **0.039*** | 0.151 | 0.877 | 0.324 | 0.295 | **0.001*** | **0.001*** | **< 0.001**** | 0.270 | 0.204 | **< 0.001**** |  | 0.000 | 0.288 | **0.027*** | 0.722 | **0.010*** |
| P15 | **Coefficient** | 0.103 | -0.180 | .352* | -0.153 | 0.085 | -0.132 | 0.153 | .508** | -.561** | .638** | 0.121 | -0.224 | .683** | .833** | 1.000 | 0.206 | .353* | 0.167 | .346* |
| **p** | 0.513 | 0.248 | 0.021 | 0.327 | 0.587 | 0.399 | 0.328 | 0.001 | 0.000 | 0.000 | 0.441 | 0.148 | 0.000 | 0.000 |  | 0.185 | 0.020 | 0.285 | 0.023 |
| P16 | **Coefficient** | -0.163 | -0.159 | 0.044 | -0.365 | -0.063 | -0.320 | 0.016 | -0.014 | -0.161 | 0.122 | -0.245 | 0.113 | 0.130 | 0.166 | 0.206 | 1.000 | 0.388 | 0.611 | 0.343 |
| **p** | 0.297 | 0.308 | 0.781 | **0.016*** | 0.688 | **0.037*** | 0.917 | 0.927 | 0.303 | 0.437 | 0.114 | 0.471 | 0.405 | 0.288 | 0.185 |  | **0.010*** | **< 0.001**** | **0.024*** |
| P17 | **Coefficient** | -0.021 | 0.129 | 0.309 | -0.245 | 0.050 | -0.159 | 0.309 | 0.313 | -0.280 | 0.266 | 0.057 | -0.077 | 0.295 | 0.338 | .353* | 0.388 | 1.000 | 0.270 | 0.597 |
| **p** | 0.893 | 0.411 | **0.044*** | 0.114 | 0.749 | 0.309 | **0.044*** | **0.041*** | 0.069 | 0.085 | 0.719 | 0.622 | 0.055 | **0.027*** | 0.020 | **0.010*** |  | 0.080 | **< 0.001**** |
| P18 | **Coefficient** | -0.030 | 0.019 | -0.020 | -0.190 | -0.067 | -0.170 | 0.093 | -0.042 | 0.014 | -0.045 | -0.260 | 0.160 | -0.031 | 0.056 | 0.167 | 0.611 | 0.270 | 1.000 | 0.143 |
| **p** | 0.850 | 0.901 | 0.897 | 0.223 | 0.670 | 0.275 | 0.555 | 0.791 | 0.930 | 0.775 | 0.093 | 0.306 | 0.842 | 0.722 | 0.285 | **< 0.001**** | 0.080 |  | 0.361 |
| P19 | **Coefficient** | -0.029 | 0.073 | 0.190 | -0.234 | -0.061 | -0.417 | 0.125 | 0.212 | -0.242 | 0.316 | 0.052 | -0.111 | 0.420 | 0.390 | .346* | 0.343 | 0.597 | 0.143 | 1.000 |
| **p** | 0.855 | 0.641 | 0.223 | 0.132 | 0.695 | **0.005*** | 0.424 | 0.173 | 0.118 | **0.039*** | 0.741 | 0.480 | **0.005*** | **0.010*** | 0.023 | **0.024*** | **< 0.001**** | 0.361 |  |

Table 3. Correlations among study outcomes (continued)

| **Assessments** |  | VAS P1 | VAS P2 | VAS P3 | VAS P4 | VAS P5 | VAS P6 | VAS P7 | VAS P8 | VAS P9 | P10 | P11 | P12 | P13 | P14 | P15 | P16 | P17 | P18 | P19 | T1 | T2 | T3 | T4 | T5 | T6 | T7 |
| --- | --- | --- | --- | --- | --- | --- | --- | --- | --- | --- | --- | --- | --- | --- | --- | --- | --- | --- | --- | --- | --- | --- | --- | --- | --- | --- | --- |
| T1 | **Coefficient** | 0.106 | 0.255 | 0.171 | 0.207 | -0.277 | 0.189 | 0.245 | -0.218 | 0.131 | -0.161 | -0.393 | 0.279 | -0.178 | -0.147 | -0.116 | 0.091 | 0.216 | 0.072 | 0.226 | 1.000 | 0.107 | -0.040 | 0.165 | -0.121 | -0.108 | -0.173 |
| **p** | 0.497 | 0.098 | 0.273 | 0.184 | 0.072 | 0.225 | 0.113 | 0.160 | 0.404 | 0.301 | **0.009*** | 0.070 | 0.255 | 0.346 | 0.458 | 0.560 | 0.164 | 0.644 | 0.146 |  | 0.495 | 0.798 | 0.291 | 0.438 | 0.492 | 0.266 |
| T2 | **Coefficient** | 0.038 | -0.141r | -0.039 | -0.022 | -0.101r | 0.212r | -0.003 | -0.158 | 0.011 | 0.165 | -0.178r | -0.235 | 0.152r | 0.058r | 0.009 | -0.093 | -0.207 | -0.152 | -0.255 | 0.107 | 1.000 | 0.361 | 0.126 | 0.071r | 0.118r | -0.070 |
| **p** | 0.811 | 0.367 | 0.806 | 0.891 | 0.518 | 0.173 | 0.983 | 0.311 | 0.945 | 0.291 | 0.253 | 0.129 | 0.329 | 0.710 | 0.955 | 0.551 | 0.183 | 0.332 | 0.098 | 0.495 |  | **0.017*** | 0.420 | 0.650 | 0.451 | 0.656 |
| T3 | **Coefficient** | -0.210 | -0.109 | 0.184 | 0.220 | 0.043 | -0.054 | -0.175 | 0.233 | -0.156 | 0.207 | -0.034 | -0.074 | 0.427 | 0.356 | 0.112 | -0.074 | -0.065 | 0.050 | 0.012 | -0.040 | 0.361 | 1.000 | 0.112 | 0.314 | 0.348 | 0.219 |
| **p** | 0.176 | 0.487 | 0.238 | 0.155 | 0.784 | 0.733 | 0.262 | 0.132 | 0.319 | 0.182 | 0.828 | 0.636 | **0.004*** | **0.019*** | 0.473 | 0.638 | 0.678 | 0.751 | 0.939 | 0.798 | **0.017*** |  | 0.474 | **0.040*** | **0.022*** | 0.159 |
| T4 | **Coefficient** | 0.111 | 0.528 | -0.024 | 0.192 | -0.216 | 0.121 | 0.261 | -0.112 | 0.191 | -0.225 | 0.020 | 0.087 | 0.175 | 0.158 | 0.002 | -0.266 | 0.070 | -0.360 | 0.113 | 0.165 | 0.126 | 0.112 | 1.000 | 0.112 | 0.205 | 0.085 |
| **p** | 0.479 | **< 0.001**** | 0.879 | 0.217 | 0.164 | 0.440 | 0.092 | 0.476 | 0.221 | 0.146 | 0.899 | 0.581 | 0.261 | 0.312 | 0.992 | 0.084 | 0.656 | **0.018*** | 0.471 | 0.291 | 0.420 | 0.474 |  | 0.474 | 0.187 | 0.590 |
| T5 | **Coefficient** | 0.187 | -0.236r | 0.369 | -0.166 | -0.002r | -0.041r | 0.109 | 0.589 | -0.581 | 0.575 | 0.114r | -0.342 | 0.692r | 0.670r | 0.589 | 0.149 | 0.274 | -0.020 | 0.413 | -0.121 | 0.071r | 0.314 | 0.112 | 1.000 | 0.845r | 0.780 |
| **p** | 0.230 | 0.127 | **0.015*** | 0.289 | 0.991 | 0.795 | 0.488 | **< 0.001**** | **< 0.001**** | **< 0.001**** | 0.465 | **0.025*** | **< 0.001**** | **< 0.001**** | **< 0.001**** | 0.339 | 0.076 | 0.900 | **0.006*** | 0.438 | 0.650 | **0.040*** | 0.474 |  | **< 0.001**** | **< 0.001**** |
| T6 | **Coefficient** | 0.178 | -0.035r | 0.447 | -0.168 | -0.067r | 0.019r | 0.249 | 0.591 | -0.540 | 0.569 | 0.111r | -0.295 | 0.651r | 0.790r | 0.658 | 0.148 | 0.388 | 0.069 | 0.341 | -0.108 | 0.118r | 0.348 | 0.205 | 0.845r | 1.000 | 0.845 |
| **p** | 0.252 | 0.823 | **0.003*** | 0.282 | 0.668 | 0.901 | 0.108 | **< 0.001**** | **< 0.001**** | **< 0.001**** | 0.479 | 0.055 | **< 0.001**** | **< 0.001**** | **< 0.001**** | 0.342 | **0.010*** | 0.660 | **0.025*** | 0.492 | 0.451 | **0.022*** | 0.187 | **< 0.001**** |  | **< 0.001**** |
| T7 | **Coefficient** | 0.113 | -0.045 | 0.404 | -0.147 | 0.115 | 0.030 | 0.245 | 0.688 | -0.591 | 0.628 | 0.105 | -0.283 | 0.707 | 0.805 | 0.843 | 0.178 | 0.380 | 0.164 | 0.290 | -0.173 | -0.070 | 0.219 | 0.085 | 0.780 | 0.845 | 1.000 |
| **p** | 0.470 | 0.774 | **0.007*** | 0.347 | 0.461 | 0.847 | 0.114 | **< 0.001**** | **< 0.001**** | **< 0.001**** | 0.503 | 0.066 | **< 0.001**** | **< 0.001**** | **< 0.001**** | 0.254 | **0.012*** | 0.295 | 0.060 | 0.266 | 0.656 | 0.159 | 0.590 | **< 0.001**** | **< 0.001**** |  |

WISCI II: Walking Index for Spinal Cord Injury II; LEMS: Lower Extremity Motor Score; m/s: meters per second; TUG: Timed Up and Go; BBS: Berg Balance Scale; SCIM III: Spinal Cord Independence Measure III; WHOQOL-BREF: World Health Organization Quality of Life-BREF; QUEST 2.0: Quebec User Evaluation of Satisfaction with Assistive Technology 2.0; RHDS/SF: Readiness for Hospital Discharge Scale/Short Form; AAQ-II: Acceptance and Action Questionnaire–II; SCLCSQ: Spinal Cord Lesion–related Coping Strategies Questionnaire; P1–P19: patient-reported items; T1–T7: clinician-reported items (see Appendix 1); ρ: Spearman’s rank correlation coefficient. Statistically significant p-values are shown in bold. *p < 0.05; **p < 0.01.
