# Supplementary material
Source: Research Square preprint supplement (doi:10.21203/rs.3.rs-9327618/v1)
Supplement: Supplementary file 4 [file e4e0c32dc51885d2b11410ff.docx]

1. The demographic and clinical characteristics of the participants.

| **Assessments** | | | **Mean ± SD (median)** |
| --- | --- | --- | --- |
| **Age** | | | 43.6 ± 13.5 (44.0) |
| **BMI (kg/m2)** | | | 25.7± 4.5 (26.1) |
| **TSI (months)** | | | 16.4 ± 17.4 (11.0) |
|  | | | **n (%)** |
| **Sex** | **Women** | | 21 (48.8) |
| **Men** | | 22 (51.2) |
| **Type of Injury** | Traumatic | | 29 (67.4) |
| Nontraumatic | | 14 (32.6) |
| **ASIA Impairment Scale (AIS)** | Thoracal | AIS C | 8 (18.6) |
| AIS D | 5 (11.6) |
| Lumbar | AIS C | 15 (34.9) |
| AIS D | 15 (34.9) |

BMI: body mass index; kg/m2: kilograms/square meter; TSI: time since injury; SD: standard deviation; ASIA: American Spinal Injury Association.
